# Supplementary material for: Inhibition of Cholesterol Esterification Enzyme Enhances the Potency of Human Chimeric Antigen Receptor T Cells against Pancreatic Carcinoma
Source: PubMed Central journal article supplement — Mol Ther Oncolytics. 2020 Feb 4;16:262–71. doi: 10.1016/j.omto.2020.01.008 (PMC7063140; doi:10.1016/j.omto.2020.01.008), 2020-02-04
Supplement: mmc1.pdf [file mmc1.pdf]

**OMTO, Volume 16**

**Supplemental Information**

**Inhibition of Cholesterol Esterification Enzyme  
Enhances the Potency of Human Chimeric Antigen  
Receptor T Cells against Pancreatic Carcinoma**

**Lei Zhao, Yang Liu, Fuya Zhao, Ye Jin, Jing Feng, Rui Geng, Jiayu Sun, Liqing Kang, Lei Yu, and Yunwei Wei**

Supplementary Figure S1. The cytokine release in all MSLN-negative target groups after standard LDH release assays.

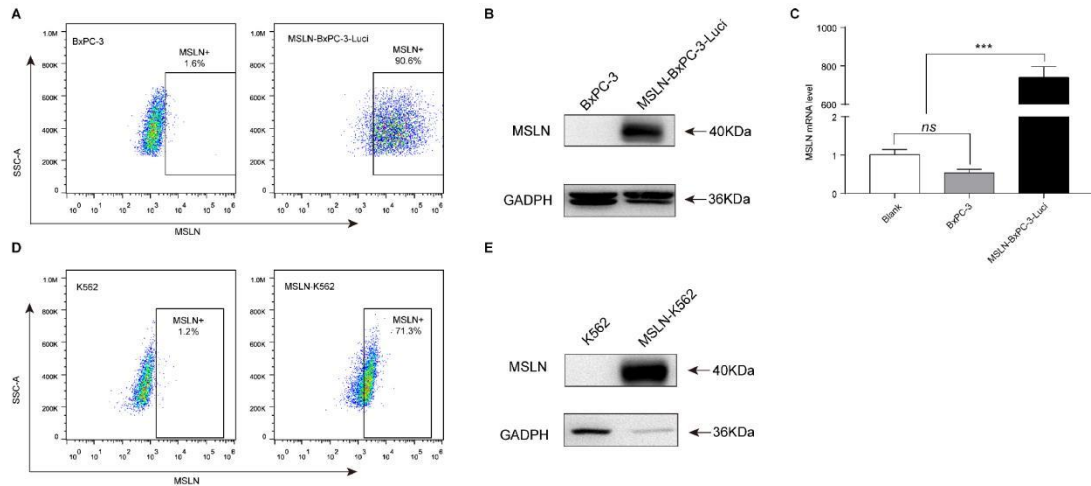

Supplementary Figure S2. Immunofluorescence image showing MSLN expression in mouse PC tissue. MSLN-positive cell membrane, red; cell nucleus, blue.

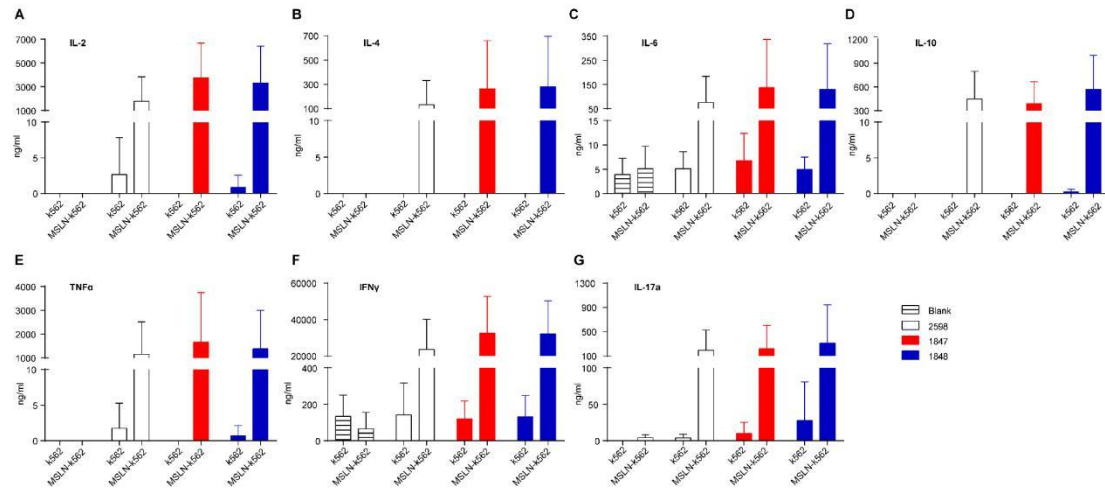

Supplementary Figure S3. Immunofluorescence image showing targeting MSLN CAR-T cell infiltration in mouse PC tissue. MSLN-positive cell membrane, red; cell nucleus, blue. Representative targeting MSLN CAR-T cells in OC tissue are indicated by the yellow arrow.

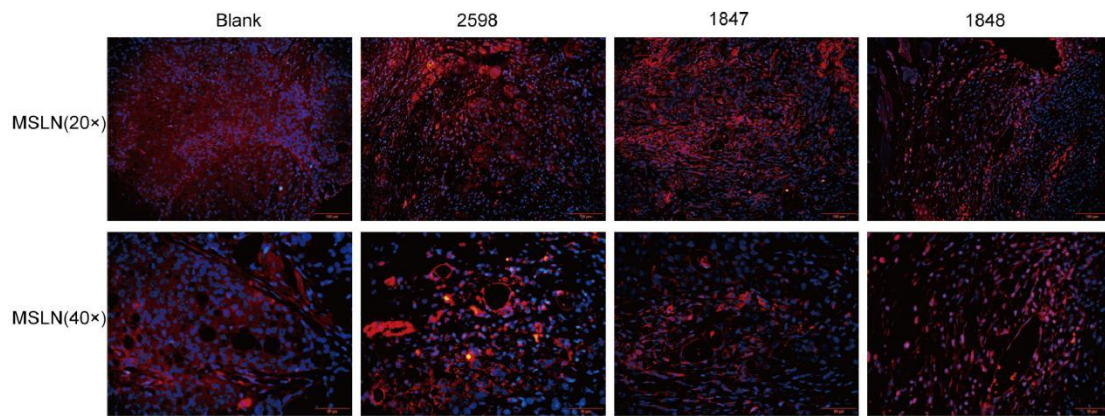

Supplementary Figure S4. Detection of MSLN expression in target cells. MSLN expression levels in BxPC-3 and MSLN-BxPC-3-Luci cells as determined using (A) flow cytometry, (B) western blotting, and (C) quantitative real-time RT-PCR. (D) Flow cytometry profile and (E) western blot image showing MSLN expression in K562 cells and MSLN-K562 cells.

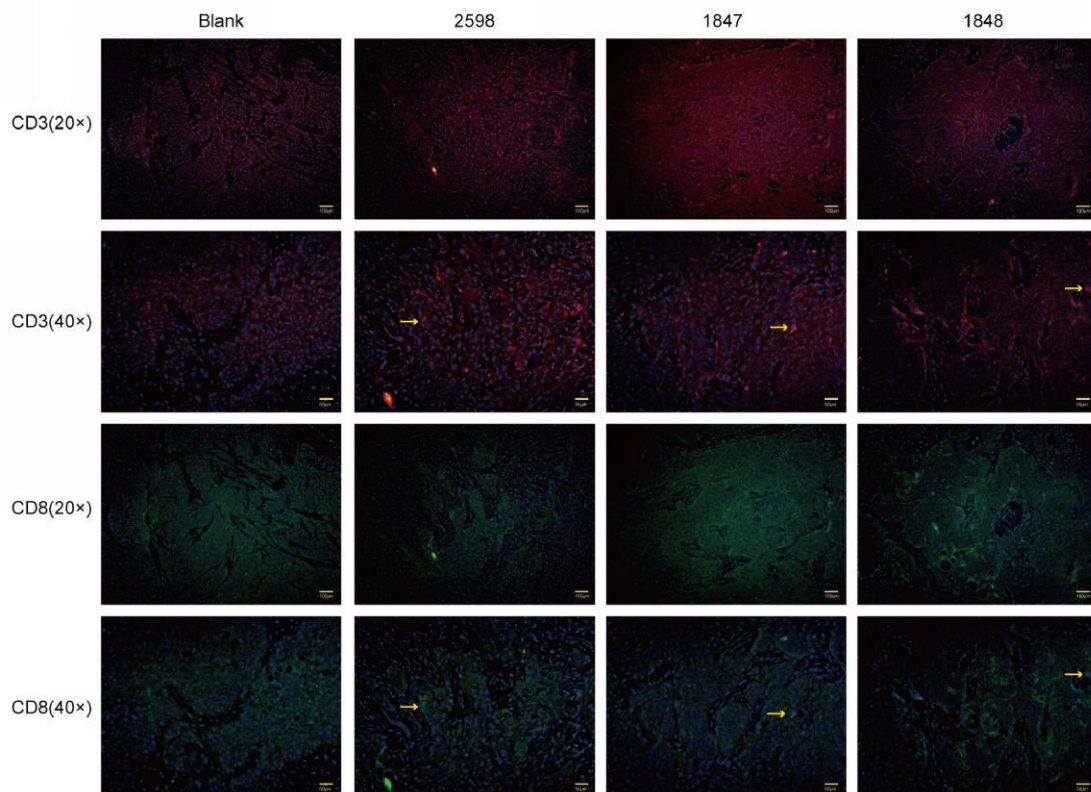

Supplementary Table S1. Profile showing the CAR transduction efficiency of targeting MSLN CAR-T cells.

|        | CAR-T-2598 | CAR-T-1847 | CAR-T-1848 |
|--------|------------|------------|------------|
| Case 1 | 75.97%     | 71.20%     | 66.23%     |
| Case 2 | 70.13%     | 70.53%     | 58.73%     |
| Case 3 | 65.17%     | 58.43%     | 54.57%     |
| Case 4 | 21.93%     | 12.63%     | 14.87%     |
| Case 5 | 20.23%     | 13.97%     | 14.63%     |
| Case 6 | 30.30%     | 18.30%     | 13.40%     |

Supplementary Table S2. Patient and healthy control group information.

|              | Normal (n = 5) | <sup>a</sup> AP (n = 6) | <sup>b</sup> PC (n = 9) | <sup>c</sup> M-PC (n = 4) |
|--------------|----------------|-------------------------|-------------------------|---------------------------|
| Gender       |                |                         |                         |                           |
| female       | 0              | 3                       | 2                       | 0                         |
| male         | 5              | 3                       | 7                       | 4                         |
| Age(mean±SE) | 28.2±1.2       | 58.3±11.3               | 64.0±9.7                | 56.8±3.9                  |

<sup>a</sup>AP: Acute Pancreatitis; <sup>b</sup>PC: Pancreatic Cancer; <sup>c</sup>M-PC: Pancreatic Cancer with Metastasis
